# Supplementary material
Source: Elsevier journal article supplement (https://www.sciencedirect.com/science/article/pii/S0034935620301870)
Supplement: mmc1 [file S0034935620301870:mmc1.docx]

Anexo

**MÉTODOS**

**Definiciones de los resultados**

Las complicaciones médicas e infecciosas siguieron la definición estándar.

*-Complicaciones médicas:*

1. Síndrome de distrés respiratorio agudo. Conforme a la definición de Berlín1.

Leve: PaO2/FiO2 de 200 a 300

Moderado: PaO2/FiO2 de 100 a 200

Severo: PaO2/FiO2 > 100

No se necesitó un nivel PEEP de al menos 5 cm de agua para poder clasificar a los pacientes que recibieron HFNC o mascarilla facial convencional.

2. Shock3.

La mejor definición de shock es la forma generalizada y con riesgo de muerte de fallo circulatorio agudo asociado a la inadecuada utilización del oxígeno por parte de las células. Se trata de un estado en el que la circulación es incapaz de suministrar oxígeno suficiente para satisfacer las demandas de los tejidos, lo cual origina disfunción celular. El resultado es disoxia celular, es decir, la pérdida de independencia fisiológica entre el suministro y el consumo de oxígeno, asociada a un incremento de los niveles de lactato. Algunos síntomas clínicos sugieren el deterioro de la microcirculación, incluyendo piel moteada, acrocianosis, disminución del tiempo de llenado capilar, e incremento del gradiente de temperatura central-periférica.

3. Hemorragia4.

Sospecha clínica de hemorragia más descenso de hemoglobina > 3 g/dL o necesidad de trasfusión.

4. Embolia pulmonar5.

Probabilidad clínica + imagen + variables de laboratorio.

5. Paro cardiaco.

Actividad eléctrica sin pulso o fibrilación ventricular /taquicardia ventricular sin pulso.

6. Insuficiencia cardiaca6.

Signos y síntomas clínicos con o sin preservación de fracción de eyección ventricular izquierda.

Anomalía de la estructura o función cardiaca que origina la falta de suministro de oxígeno a una tasa proporcional a los requisitos de los tejidos metabolizadores, a pesar de las presiones de llenado.

7. Arritmias.

Nueva aparición:

- Fibrilación auricular, aleteo auricular.

- Otras taquicardias supraventriculares

- Taquicardia ventricular / Torsade de Pointes

- Bloqueo auriculoventricular ≥2 grados.

8. Ictus7.

Disfunción neurológica causada por infarto focal cerebral, medular u ocular ± imagen (causado por isquemia o hemorragia)

9. Insuficiencia renal aguda. Conforme a las definiciones de "Kidney Disease Improving Global Outcomes"8.

**Estadio 1**: uno de los siguientes:

- Incremento de creatinina sérica 1,5–1,9 veces basales
- Incremento de creatinina sérica >0,3 mg/dl (26,5 µmol/l)
- Gasto urinario < 0,5 ml/kg/h durante un bloqueo de 6 horas

**Estadio 2**: uno de los siguientes:

- Incremento de creatinina sérica 2–2,9 veces basales
- Gasto urinario <0,5 ml/kg/h durante dos bloqueos de 6 horas

**Estadio 3**: uno de los siguientes:

- Incremento de creatinina sérica >3 veces basales
- Incremento de creatinina sérica >4 mg/dl (353 µmol/l)
- Iniciación a terapia de reemplazo renal
- Gasto urinario <0,3ml/kg/h durante más de 24 horas
- Anuria de más de 12 horas

En las tablas presentadas en el documento principal y el material complementario, sólo se considera IRA estadios II y III.

10. Elevación de enzimas hepáticas.

Definida por la elevación x2 veces de los valores normales de bilirrubina y/o TGP.

*- Complicaciones infecciosas*

1. Súper-infección respiratoria9.

Presencia de signos/síntomas infecciosos de origen respiratorio sin criterios radiológicos que definan la presencia de neumonía.

2. Neumonía9.

Definida por la presencia de un nuevo infiltrado pulmonar más la evidencia clínica de que dicho infiltrado es de origen infeccioso, lo cual incluye la aparición de fiebre, esputos purulentos, leucocitosis y descenso de la oxigenación.

3. Infección del torrente sanguíneo10.

Definida por la positividad de los cultivos hematológicos. Para agentes colonizadores cutáneos comunes (estafilococos negativos a coagulasa), se requirieron dos cultivos para la presencia de dicha complicación. No se precisó la fuente vascular primaria (podría ser infección del torrente sanguíneo secundaria).

4. Infección urinaria11.

Cultivo de orina positivo más signos y síntomas de infección.

5. Shock séptico12.

Sepsis con vasopresores necesarios para mantener una presión arterial media ≥65 mmHg y un nivel de lactato sérico > 2 mmol l-1 en ausencia de hipovolemia12.

**RESULTADOS**

**Tabla S1. Escalas de severidad, signos vitales y marcadores de laboratorio durante la estancia en UCI.**

|  | **Total** | **Supervivientes** | **No supervivientes** | **Valor P** |
| --- | --- | --- | --- | --- |
| (n=663) | (n=460) | (n=203) |
| **Escalas** | | | | |
| SOFA máximo | 8 [5-11] /583 | 7 [5-9] /424 | 11 [9-13] /159 | **<10-28** |
| **Signos vitales** | | | | |
| Temperatura máxima, ºC | 37,8 [37,0-38,5] /648 | 37,7 [37,0-38,4] /453 | 38,0 [37,0-38,6] /195 | **0,014** |
| Presión arterial media mínima, mmHg | 70,0 [62,3-78,3] /646 | 73,3 [65,0-79,7] /451 | 65,0 [56,7-72,7] /195 | **<10-8** |
| Frecuencia cardiaca máxima, lpm | 100 [88-118] /649 | 98 [85-110] /454 | 113 [100-126] /195 | **<10-14** |
| SpO2, mínima, % | 86 [75-90] /646 | 87 [80-90] /449 | 80 [65-87] /197 | **<10-10** |
| **Oximetría arterial** | | | | |
| PaO2/FiO2 mínimo | 90 [69-121] /621 | 99 [77-132] /438 | 72 [59-91] /183 | **<10-18** |
| PaCO2 máximo, mmHg | 55 [44-67] /663 | 51 [42-61] /442 | 66 [57-79] /191 | **<10-21** |
| **Hallazgos de laboratorio** | | | | |
| Ferritina máxima, ng/mL | 1569 [804-2729] /538 | 1463 [747-2545] /386 | 1814 [1119-3353] /152 | **<0,001** |
| Dímero D máximo, ng/mL | 4600 [2047-7492] /619 | 3972 [1800-7330] /438 | 5550 [3224-7840] /181 | **<0,001** |
| PCR máxima, mg/dL | 30,1 [15,9-193,4] /648 | 27,3 [13,6-171,0] /454 | 39,1 [23,0-256,0] /194 | **<10-4** |
| Recuento linfocitario, mínimo, µL | 0,40 [0,23-0,60] /649 | 0,41 [0,30-0,60] /454 | 0,30 [0,20-0,50] /195 | **<10-7** |
| Ratio PCR/ linfocitos máximo | 65,5 [24,6-300,0] /647 | 57,2 [20,3-244,6] /453 | 92,7 [40,7-480,7] /194 | **<10-5** |
| IL-6 máxima, pg/mL | 179 [40-1057] /191 | 128 [31-484] /129 | 1036 [131-2421] /62 | **<10-6** |
| LDH máximo, U/L | 524 [412-695] /633 | 482 [391-619] /447 | 646 [496-879] /186 | **<10-12** |
| Leucocitos máximos, 103/ µL | 11,2 [7,2-16,5] /642 | 10,6 [6,9-15,3] /451 | 13,1 [8,5-20,3] /191 | **<10-4** |
| Procalcitonina máxima, ng/mL | 0,53 [0,19-2,12] /601 | 0,36 [0,15-0,98] /426 | 2,00 [0,60-7,85] /175 | **<10-20** |
| Plaquetas máximas, 1000/mm3 | 359 [265-455] /650 | 381 [284-473] /455 | 311 [228-409] /195 | **<10-6** |
| Bilirrubina, máxima, mg/dL | 1,20 [0,80-2,30] /622 | 1,19 [0,76-1,92] /441 | 1,60 [0,90-3,20] /181 | **<0,001** |
| TGP máxima, U/L | 99 [57-180] /647 | 100 [58-171] /455 | 95 [51,5-193,5] /192 | 0,762 |
| Creatinina máxima, mg/dL | 1,10 [0,82-1,88] /648 | 1,00 [0,78-1,42] /455 | 1,74 [1,12-3,59] /193 | **<10-17** |
| Urea máxima, mg/dL | 84 [53-126,5] /564 | 72 [45-105] /389 | 117 [79-183] /175 | **<10-16** |
| Troponina máxima, ng/mL | 22,5 [6,6-100,0] /503 | 14,5 [5,0-59,0] /358 | 62,2 [22,9-263,3] /145 | **<10-10** |
| NT-ProBNP, máxima pg/mL | 390 [121-1415] /191 | 274 [91-896] /117 | 833 [195-2767] /74 | **<0,001** |
| Hematocrito mínimo, % | 39,0 [35,1-42,0] /633 | 39,0 [36,0-42,3] /446 | 38,2 [34,0-42,0] /187 | 0,050 |
| Lactato máximo, mmol/L | 1,49 [1,14-2,00] /476 | 1,42 [1,10-1,90] /335 | 1,61 [1,20-2,20] /141 | **0,009** |

Tabla S1. Se muestran los peores valores (máximo o mínimo). Los datos se expresan como mediana [rango intercuartílico] o recuento (porcentaje). Para las variables numéricas, se presentan los recuentos totales para cada casilla. Los valores P se calcularon con la prueba de Mann-Whitney para las variables numéricas, y la prueba exacta de Fisher para las variables categóricas. SOFA: evaluación de fallo orgánico secuencial; SpO2: saturación de oxihemoglobina periférica; PaO2/FiO2: ratio presión parcial de oxígeno arterial/fracción de oxígeno inspirado; PaCO2: presión parcial de dióxido de carbono; CRP: proteína C reactiva; IL-6: interleucina 6; LDH: lactato deshidrogenasa; TGP: transaminasa glutámico-pirúvica; NT-proBNP: prohormona N-terminal del péptido natriurético cerebral.

**Tabla S2. Factores de riesgo durante el ingreso asociados a la muerte en UCI.**

| **Factores de riesgo asociados a la muerte en UCI durante la evolución clínica (N=231)** | | |
| --- | --- | --- |
| **Variables** | **OR (95% CI)** | **Valor P** |
| Edad, años | 1,036 (0,983, 1,092) | 0,117 |
| SOFA máxima | 1,364 (1,132, 1,645) | **0,001** |
| APACHE II por incremento de 5 puntos* | 1,611 (1,044, 2,487) | **0,031** |
| Presión arterial media mínima, mmHg | 0,991 (0,952, 1,031) | 0,651 |
| Frecuencia cardiaca máxima, lpm | 1,012 (0,982, 1,044) | 0,433 |
| Frecuencia respiratoria, máxima, rpm | 0,947 (0,876, 1,024) | 0,174 |
| PaO2/FiO2, mínimo | 0,949 (0,924, 0,974) | **<0,0001** |
| PCR, máxima, mg/dL | 1,001 (0,997, 1,005) | 0,558 |
| Ferritina, máxima, por incremento de 100 ng/mL | 0,992 (0,964, 1,021) | 0,605 |
| Dímeros D, máximo, per 100 ng/mL | 1,009 (0,991, 1,027) | 0,323 |
| Lactato, máximo, mmol/L | 1,200 (0,753, 1,912) | 0,442 |
| Leucocitos, máximos, 103/mL | 1,004 (0,952, 1,060) | 0,969 |
| Procalcitonina, máxima | 1,06 (1,01, 1,11) | **0,030** |
| Plaquetas, máximas, 1000/mm3 | 0,997 (0,993, 1,000) | **0,045** |
| Bilirrubina, máxima, mg/dL | 0,987 (0,849, 1,147) | 0,863 |
| Creatinina, máxima, mg/dL | 1,007 (0,718, 1,411) | 0,097 |
| Urea máxima, mg/dL | 1,004 (0,997, 1,011) | 0,215 |
| Troponina máxima, per 100 ng/mL | 1,011 (0,999, 1,023) | 0,071 |
| Hematocrito, mínimo, % | 0,967 (0,887, 1,055) | 0,454 |
| Pseudo-R2 global 0,542 | | |

Tabla S2. Peores valores durante el ingreso para predecir el riesgo de mortalidad. Número de sujetos en los que se desarrolló el modelo (aquellos sin ningún dato ausente). OR: odds ratio; SOFA: evaluación de fallo orgánico secuencial; SpO2: saturación de oxihemoglobina periférica; PaO2/FiO2: ratio presión parcial de oxígeno arterial/fracción de oxígeno inspirado; PaCO2: presión parcial de dióxido de carbono; PCR: proteína C reactiva; IL-6: interleucina 6; LDH: lactato deshidrogenasa*. Se calculó APACHE II al ingreso.

**Tabla S3. Cronología de las complicaciones en UCI**

|  | **Total** | **Supervivientes** | **No supervivientes** | **Valor P** |
| --- | --- | --- | --- | --- |
| (n=663) | (n=460) | (n=203) |
| **Cronología de las complicaciones médicas: días desde** | | | | |
| Síntomas hasta SDRA | 10 [7-14] /590 | 10 [7-14] /402 | 10 [8-14,5] /188 | 0,251 |
| Ingreso en UCI hasta SDRA | 0 [0-1] /597 | 0 [0-1] /407 | 0 [0-2] /190 | **0,021** |
| Síntomas hasta shock | 13 [10-20] /145 | 12 [8-17] /63 | 16 [11-23] /82 | **0,009** |
| Ingreso en UCI hasta shock | 4 [1-11] /147 | 3 [1-7] /64 | 5 [2-13] /83 | **0,027** |
| Síntomas hasta hemorragia | 20 [15-26] /21 | 20,5 [17-28] /10 | 16 [13-26] /11 | 0,398 |
| Ingreso en UCI hasta hemorragia | 9,5 [4-18] /22 | 11 [6-18] /11 | 8 [4-18] /11 | 0,552 |
| Síntomas hasta tromboembolismo | 19 [13-28] /61 | 18 [13-27] /42 | 24 [12-28] /19 | 0,370 |
| Ingreso en UCI hasta tromboembolismo | 8 [3-18] /64 | 7 [2,50-18] /44 | 14 [4-20] /20 | 0,206 |
| Síntomas hasta paro cardiaco | 16 [12-25] /23 | 21 [15-34] /3 | 15 [12-24,5] /20 | 0,234 |
| Ingreso en UCI hasta paro cardiaco | 6 [2-13] /23 | 13 [4-33] /3 | 6 [2-12] /20 | 0,234 |
| Síntomas hasta isquemia miocárdica | 13 [8-20] /21 | 17,5 [11-21,5] /8 | 11 [8-16] /13 | 0,231 |
| Ingreso en UCI hasta isquemia miocárdica | 2 [0-5] /21 | 1,5 [0-3] /8 | 3 [0-6] /13 | 0,706 |
| Síntomas hasta arritmias | 16 [11-23] /82 | 15 [8-22] /39 | 16 [11-24] /43 | 0,223 |
| Ingreso en UCI hasta arritmias | 5,5 [1-13] /82 | 5 [0-12] /39 | 7 [2-13] /43 | 0,166 |
| Síntomas hasta accidente cerebrovascular isquémico | 16 [12,5-22,5] /8 | 14 [9-14] /3 | 22 [18-23] /5 | 0,099 |
| Ingreso en UCI hasta accidente cerebrovascular isquémico | 7 [1-12,5] /8 | 6 [0-8] /3 | 12 [2-13] /5 | 0,368 |
| Síntomas hasta insuficiencia renal aguda | 13 [8-19] /220 | 12 [8-18] /108 | 13,5 [9-19] /112 | 0,096 |
| Ingreso en UCI hasta insuficiencia renal aguda | 3 [0-8] /221 | 2 [0-7] /109 | 3,5 [0-8] /112 | 0,352 |
| Síntomas hasta insuficiencia hepática aguda | 15 [11-21] /318 | 14 [11-18] /224 | 17,5 [12-26] /94 | 0,003 |
| Ingreso en UCI hasta elevación de enzimas hepáticas | 5 [2-10] /322 | 5 [2-8] /226 | 7 [3-14] /94 | 0,005 |
| **Cronología de las complicaciones infecciosas** | | | | |
| Síntomas hasta co-infección respiratoria | 20 [14-31] /174 | 19 [14-30] /109 | 22 [14-33] /65 | 0,336 |
| Ingreso en UCI hasta co-infección respiratoria | 11 [6-18] /176 | 11 [5-18] /111 | 12 [6-19] /65 | 0,554 |
| Síntomas hasta neumonía | 25 [17-36] /41 | 23,5 [16-37] /26 | 28 [21-36] /15 | 0,448 |
| Ingreso en UCI hasta neumonía | 15 [8-22] /41 | 16,5 [6-25] /26 | 15 [9-21] /15 | 0,881 |
| Síntomas hasta bacteriemia | 22 [16-30] /171 | 20 [15-28]/106 | 24 [18-30] /65 | 0,161 |
| Ingreso en UCI hasta bacteriemia | 11 [7,5-18,5] /172 | 10 [7-18] /106 | 12 [8-19] /66 | 0,306 |
| Síntomas hasta infección urinaria | 26 [19-35] /77 | 24 [17-30] /53 | 30 [22-40] /24 | 0,020 |
| Ingreso en UCI hasta infección urinaria | 14,5 [7-21] /78 | 13 [6-20] /53 | 15 [9-24] /25 | 0,506 |
| Síntomas hasta shock séptico | 20 [13-25] /41 | 14,5 [6-20] /12 | 21 [15-25] /29 | 0,039 |
| Ingreso en UCI hasta shock séptico | 9 [3-16] /41 | 3 [0-8,5] /12 | 10 [6-17] /29 | 0,027 |

Tabla S3. Los datos se expresan como mediana [rango intercuartílico]. Para las variables numéricas, se presentan los recuentos totales para cada casilla. Los valores P se calcularon con la prueba de Mann-Whitney para las variables numéricas, y la prueba exacta de Fisher para las variables categóricas. SDRA: síndrome de distrés respiratorio agudo; UCI: unidad de cuidados intensivos.

**Tabla S4. Datos demográficos, comorbilidades, terapia farmacológica, síntomas, escalas, signos vitales y marcadores de laboratorio al ingreso: pacientes activos**

|  | Pacientes activos |
| --- | --- |
| (n=138) |
| Edad, años | 64,00[55,00-69,00] |
| Mujeres | 30 (22,06%) |
| Índice de masa corporal, kg/m2 | 27,24[25,66-31,13] |
| Hipertensión arterial | 42 (30,43%) |
| Diabetes Mellitus | 23 (16,67%) |
| Insuficiencia cardiaca crónica | 0 (0,00%) |
| Insuficiencia renal crónica | 6 (4,35%) |
| Asma | 2 (1,45%) |
| EPOC | 8 (5,80%) |
| Obesidad | 18 (29,03%) |
| Dislipidemia | 16 (11,59%) |
| Neoplasia | 2 (1,45%) |
| Antihipertensivos | 40 (28,99%) |
| Fármacos hipoglucemiantes | 21 (15,22%) |
| Fármacos antiplaquetarios | 11 (7,97%) |
| Anticoagulantes | 9 (6,52%) |
| Broncodilatores | 28 (20,29%) |
| Fármacos para reducción de lípidos | 4 (2,90%) |
| Reemplazo de hormona tiroidea | 6 (4,35%) |
| Inmunosupresores | 4 (2,90%) |
| Corticosteroides | 7 (5,07%) |
| hasta el ingreso hospitalario | 7 [4-10] |
| hasta el ingreso en UCI | 10 [7-15] |
| Fiebre | 88 (63,77%) |
| Tos | 54 (39,13%) |
| Disnea | 76 (55,07%) |
| Mialgia | 20 (14,49%) |
| Cefalea | 9 (6,52%) |
| Rinorrea | 0 (0,00%) |
| Vómitos | 3 (2,17%) |
| Artralgia | 6 (4,35%) |
| Dolor torácico | 5 (3,62%) |
| Esputos | 7 (5,07%) |
| Anosmia | 6 (4,35%) |
| Faringodinia | 2 (1,45%) |
| Diarrea | 15 (10,87%) |
| Fatiga | 4 (2,90%) |
| APACHE II | 15 [10-17] |
| SOFA | 6 [4-8] |
| Temperatura, ºC | 36,9 [36,4-37,6] |
| Presión arterial media, mmHg | 86,3 [77,3-96] |
| Frecuencia cardiaca, lpm | 89 [75-105] |
| SpO2, % | 88 [80-91] |
| Frecuencia respiratoria, rpm | 25 [22-30] |
| PaO2/FiO2 <100 | 21 (38,2%) |
| PaO2/FiO2 100-200 | 22 (40,0%) |
| PaO2/FiO2 >200 | 12 (21,8%) |
| Ratio ventilatorio | 2,31 [1,63-3,53] |
| Ferritina, ng/mL | 1359 [942-2180] |
| Dímeros D, ng/mL | 1036 [578-2350] |
| PCR, mg/dL | 115,5 [24,1-179,5] |
| Linfocitos, µL | 0,62 [0,43-0,99] |
| Ratio PCR/linfocitos | 147,8 [42,0-337,3] |
| IL-6, pg/mL | 61,3 [36,7-418] |
| LDH, U/L | 482 [367-653] |
| Leucocitos, 103/ µL | 8,52 [6,10-13,00] |
| Procalcitonina, ng/mL | 0,22 [0,10-0,62] |
| Plaquetas, 1000/mm3 | 201 [149,5-280] |
| Bilirrubina, mg/dL | 0,63 [0,47-0,90] |
| TGP, U/L | 32 [21-55] |
| Creatinina, mg/dL | 0,88 [0,77-1,10] |
| Urea, mg/dL | 44 [28-59] |
| Troponina, ng/mL | 3,35[0-14,00] |
| NT-proBNP, pg/mL | 388 [37,5-572,5] |
| Hematocrito, % | 39,7 [34,0-42,5] |
| Lactato, mmol/L | 1,20 [1,00-1,72] |

Tabla S4. Se muestran los peores valores (máximo o mínimo). Los datos se expresan como mediana [rango intercuartílico] o recuento (porcentaje). Los valores P se calcularon con la prueba de Mann-Whitney para las variables numéricas, y la prueba exacta de Fisher para las variables categóricas. EPOC: Enfermedad pulmonar obstructiva crónica; SOFA: evaluación de fallo orgánico secuencial; SpO2: saturación de oxihemoglobina periférica; PaO2/FiO2: ratio presión parcial de oxígeno arterial/fracción de oxígeno inspirado; PaCO2: presión parcial de dióxido de carbono; PCR: proteína C reactiva; IL-6: interleucina 6; LDH: lactato deshidrogenasa; TGP: transaminasa glutámico-pirúvica; NT-proBNP: prohormona N-terminal del péptido natriurético cerebral.

**Figura S1. Cronología de las complicaciones en UCI.**

Figura S1. Se describen las complicaciones médicas e infecciosas distinguiendo entre pacientes dados de alta (gris) y fallecidos (blanco). Para cada complicación y resultado describimos el recuento y porcentaje de pacientes con la complicación, mediana y rango intercuartílico del día de inicio, y una gráfica de caja con los días desde el ingreso en UCI.

| ARDS | SDRA |
| --- | --- |
| Shock | Shock |
| Bleeding | Hemorragia |
| Thromboembolism | Tromboembolismo |
| Cardiac arrest | Paro cardiaco |
| Heart failure | Insuficiencia cardiaca |
| Arrithmyas | Arritmias |
| Ischemic stroke | Accidente cerebrovascular isquémico |
| Acute renal failure | Insuficiencia renal aguda |
| Acute liver failure | Insuficiencia hepática aguda |
| Respiratory co-infection | Co-infección respiratoria |
| Pneumonia | Neumonía |
| Bacteremia | Bacteriemia |
| Urinary infection | Infección urinaria |
| Septic shock | Shock séptico |
| Other infectious complications | Otras complicaciones infecciosas |

**REFERENCIAS**

1. Ranieri VM, Rubenfeld GD, Thompson BT, et al. Acute respiratory distress syndrome: The Berlin Definition. JAMA 2012; 307:2526-33.
2. Barberà JA, Román A, Gómez-Sánchez MA, et al. Guidelines on the Diagnosis and Treatment of Pulmonary Hypertension: Summary of Recommendations. Arch Bronconeumol. 2017.
3. Cecconi M, De Backer D, Antonelli M, et al. Consensus on circulatory shock and hemodynamic monitoring. Task force of the European society of intensive care medicine. Intensive Care Med 2014; 40:1795-815.
4. Mehran R, Rao S, Bhatt D, et al. Standardized bleeding definitions for cardiovascular clinical trials. A consensus report from the bleeding academic research consortium. Circulation 2011; 123:2736-47.
5. Konstantinides S, Meyer G, Becattini C, et al. 2019 ESC guidelines for the diagnosis and management of acute pulmonary embolism developed in collaboration with the European respiratory society (ERS). E Respir J 2019, 1901647.
6. McMurray J, Adamopoulos S, Anker S, et al. ESC guidelines for the diagnosis and treatment of acute and chronic heart failure 2012. The task force for the diagnosis and treatment of acute and chronic heart failure 2012 of the European society of cardiology. Developed in collaboration with the heart failure association (HFA) of the ESC. Eur J Heart Fail 2012; 14:803-69.
7. An update definition of the stroke for the 21st century: a statement for healthcare professionals from the American heart association/American stroke. Stroke 2013; 44:2064-89.
8. A European renal best practice (ERBP= position on the kidney disease improving global outcomes (KDIGO) clinical practice guidelines on acute kidney injury: part 1: definitions, conservative management and contrast-induced nephropathy. Nephrol Dial Transplant 2012; 27:4263-72.
9. Kalil AC, Metersky ML, Klompas M, et al. Management of Adults With Hospital-acquired and Ventilator-associated Pneumonia: 2016 Clinical Practice Guidelines by the Infectious Diseases Society of America and the American Thoracic Society. Clin Infect Dis. 2016;63(5):e61-e111. doi:10.1093/cid/ciw353
10. Mermel LA, Allon M, Bouza E, et al. Clinical practice guidelines for the diagnosis and management of intravascular catheter-related infection: 2009 Update by the Infectious Diseases Society of America. Clin Infect Dis. 2009;49(1):1-45. doi:10.1086/599376
11. Hooton TM, Bradley SF, Cardenas DD, et al. Diagnosis, prevention, and treatment of catheter-associated urinary tract infection in adults: 2009 International Clinical Practice Guidelines from the Infectious Diseases Society of America. Clin Infect Dis. 2010;50(5):625-663. doi:10.1086/650482
12. Singer M, Deutschman CS, Seymour CW, et al. The third consensus definitions for sepsis and septic shock (Sepsis-3). JAMA 2016; 23:801-10.
